# Supplementary material for: Diet Quality Affects the Association between Census-Based Neighborhood Deprivation and All-Cause Mortality in Japanese Men and Women: The Japan Public Health Center-Based Prospective Study
Source: MDPI journal article supplement (doi:10.3390/nu11092194), 2019-09-12
Supplement: s1 [file s1]

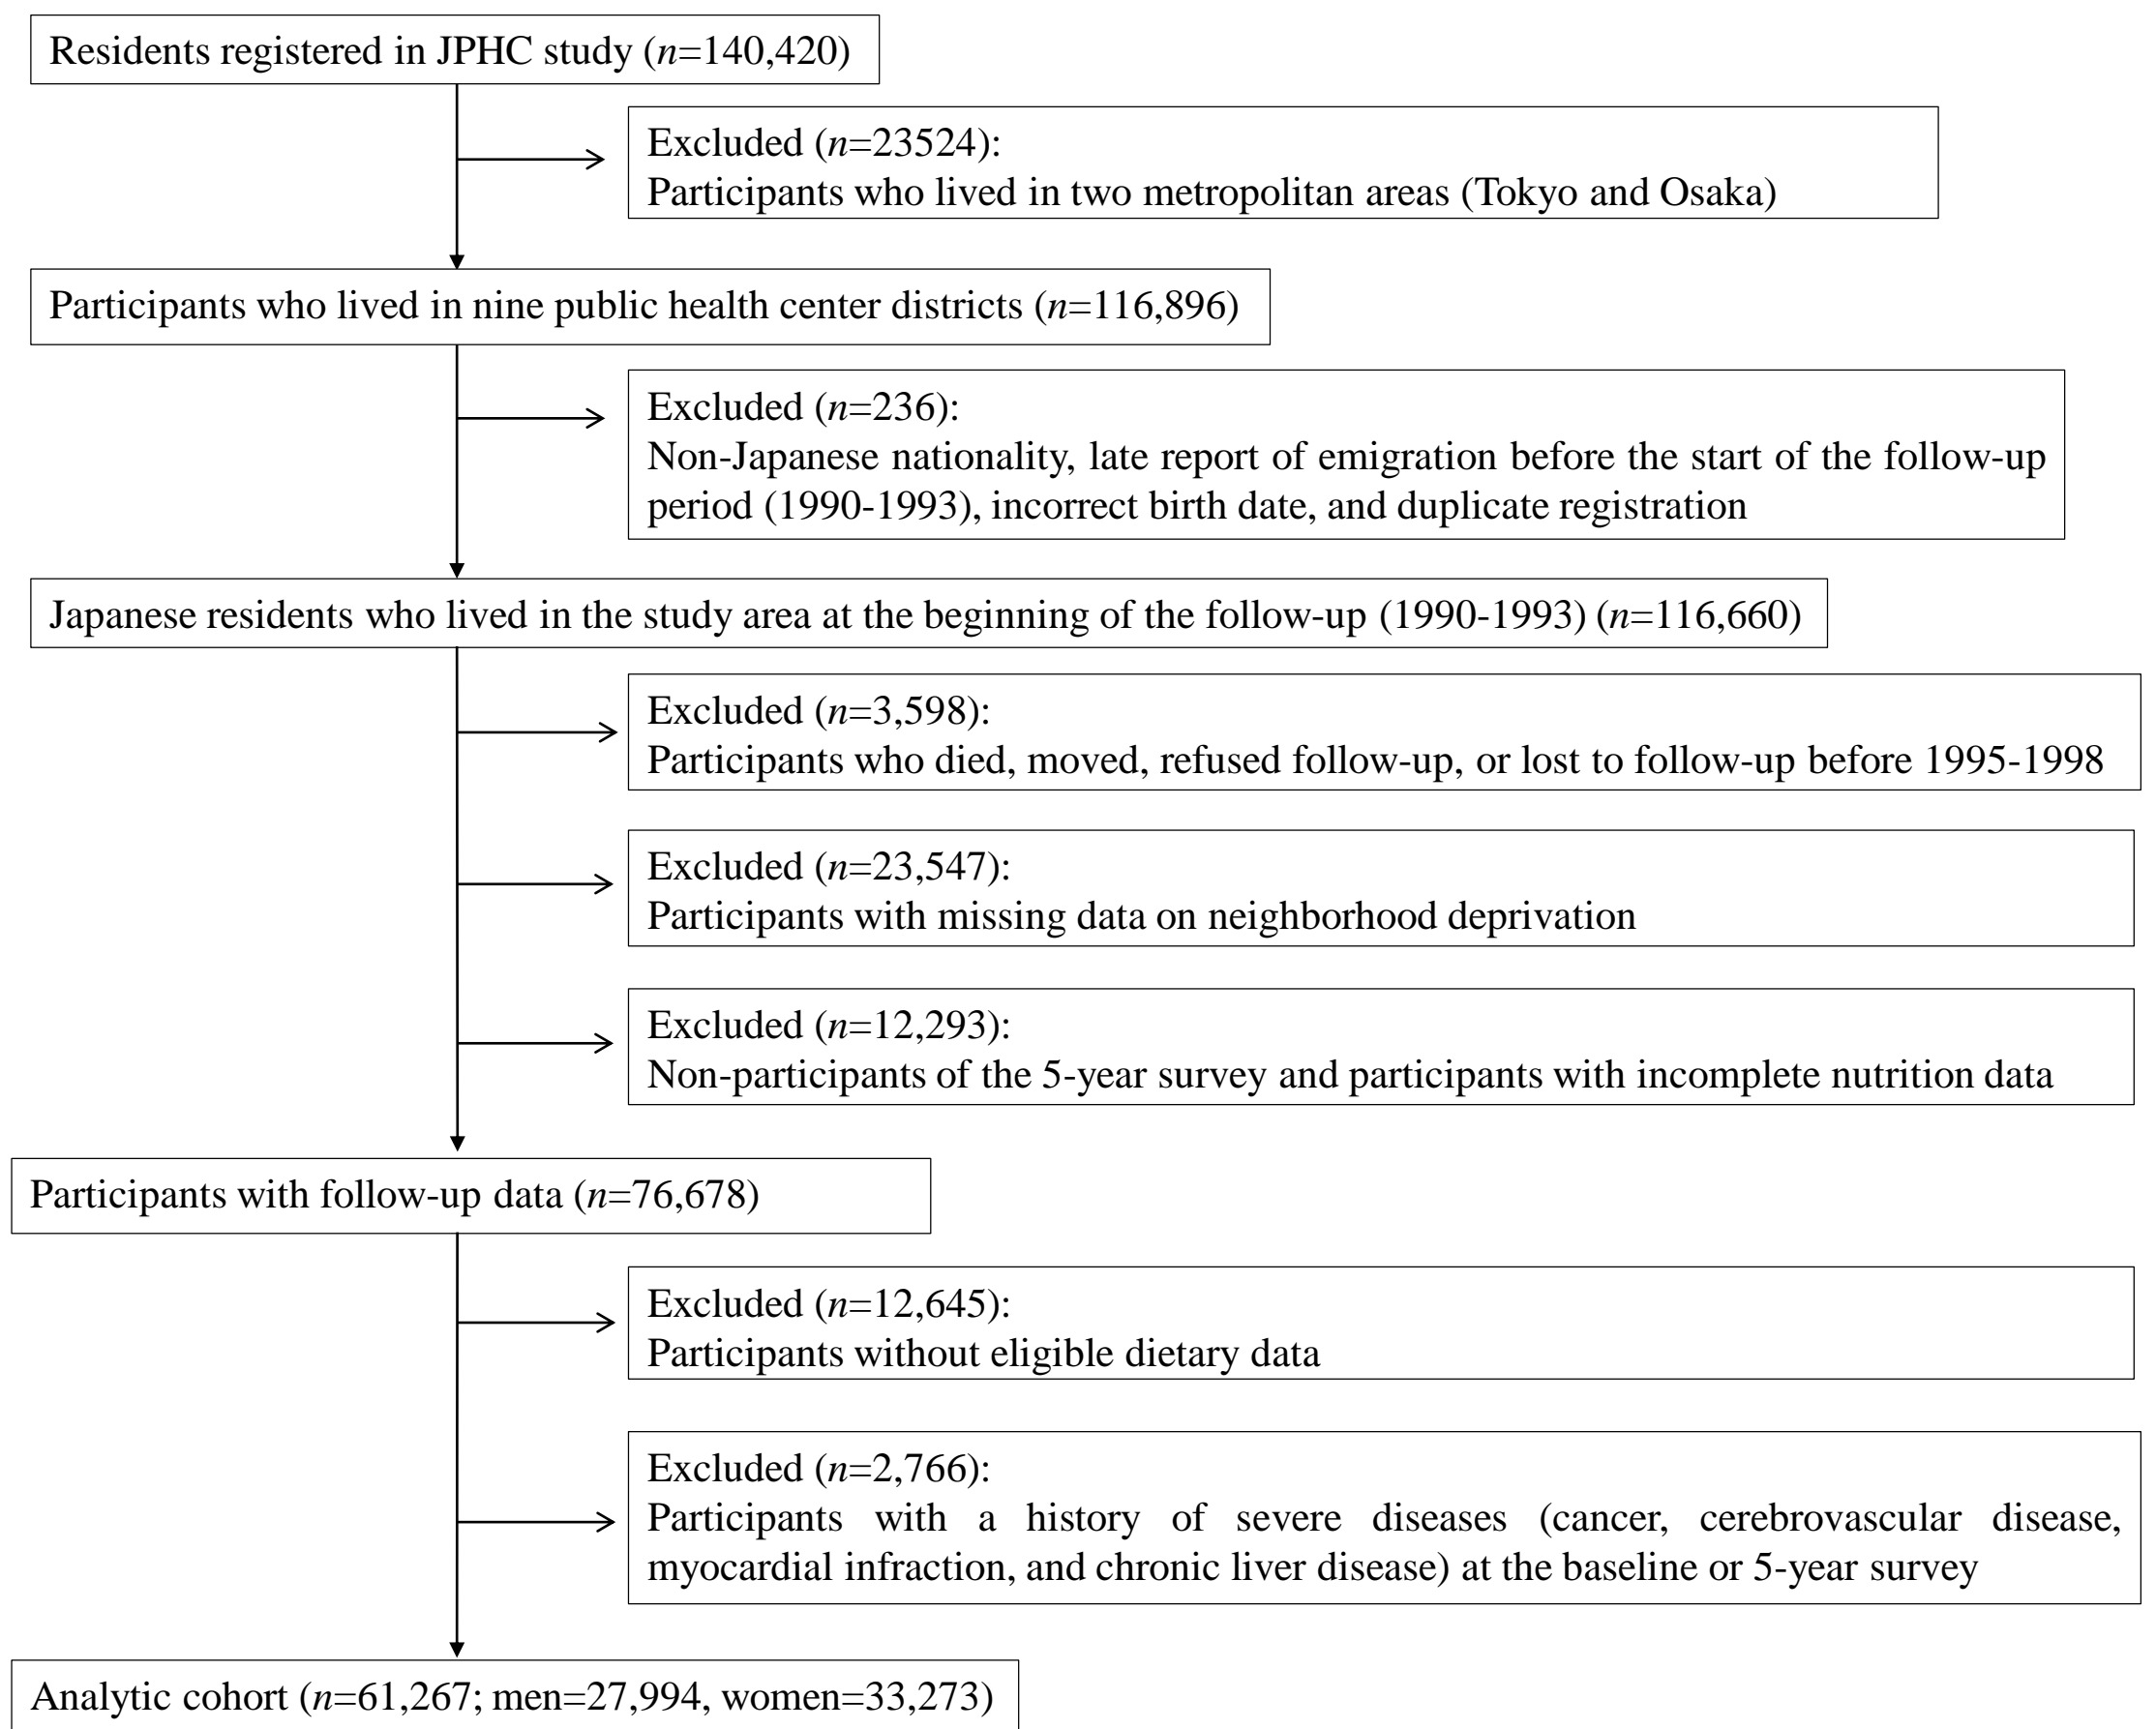

**Supplemental Figure 1.** Flowchart of the study population
